# Supplementary material for: Investigating the Genetic Diversity of Hepatitis Delta Virus in Hepatocellular Carcinoma (HCC): Impact on Viral Evolution and Oncogenesis in HCC
Source: MDPI journal article supplement (doi:10.3390/v16060817), 2024-05-21
Supplement: s1 [file s1]

Table S1: Comparisons of patient characteristics, diagnostic features, treatment, and outcomes of HBV-associated HCC diseases

|                                               | All patients(n=300)        | Anti-HDV Negative (n=292)  | Anti-HDV positive (n=8)    |
|-----------------------------------------------|----------------------------|----------------------------|----------------------------|
| Male, <i>n</i> (%)                            | 259(86.3)                  | 252(86.3)                  | 7(87.5)                    |
| Age, years                                    | 57(18-90)                  | 56.8(18-90)                | 63.1(55-79)                |
| AFP                                           | 4,780(1.52-342,193)        | 4,912(1.52-342,193)        | 111.4(3-393.5)             |
| tumor size                                    | 4.921(0.8-30)              | 4.926(0.8-30)              | 4.725(1.5-9)               |
| Albumin                                       | 4.226(2.6-5.3)             | 4.23(2.6-5.3)              | 3.36(3.4-4.56)             |
| ALT(U/L)                                      | 35.8(9-154)                | 35.993(9-30)               | 30.875(9-49)               |
| Bilirubin(mg/dl)                              | 0.773(0.2-3)               | 0.781(0.2-0.7)             | 0.475(0.2-1)               |
| HBV DNA( $\times 10^6$ IU /ml)                | 0.000389(0.000007-0.00199) | 0.000389(0.000007-0.00199) | 0.000196(0.000009-0.00182) |
| HBeAg(+), <i>n</i> (%)                        | 9(3)                       | 9(3)                       | 0                          |
| Smoking history(+), <i>n</i> (%)              | 158(52.67)                 | 152(52.05)                 | 6(75)                      |
| Drinking history(+), <i>n</i> (%)             | 123(41)                    | 117(40.07)                 | 6(75)                      |
| Cirrhosis(+), <i>n</i> (%)                    | 115(38.33)                 | 113(38.7)                  | 2(25)                      |
| Metastasis(+), <i>n</i> (%)                   | 15(5)                      | 15(5)                      | 0                          |
| HCC type <sup>a</sup> , <i>n</i> (%)          |                            |                            |                            |
| 1                                             | 231(77)                    | 224(76.7)                  | 7(87.5)                    |
| 2                                             | 69(23)                     | 68(23.3)                   | 0                          |
| Vascular invasion <sup>b</sup> , <i>n</i> (%) |                            |                            |                            |
| 0                                             | 146(48.7)                  | 143(49)                    | 3(37.5)                    |
| 1                                             | 51(17)                     | 48(16.4)                   | 0                          |
| 2                                             | 65(21.7)                   | 65(22.3)                   | 4(50)                      |
| 3                                             | 4(1.3)                     | 0                          | 0                          |
| 4                                             | 21(7)                      | 21(7.2)                    | 0                          |
| 1,2                                           | 14(4.7)                    | 14(4.8)                    | 0                          |
| 1,3                                           | 1(0.3)                     | 1(0.3)                     | 1(12.5)                    |

|                                                      |           |           |         |
|------------------------------------------------------|-----------|-----------|---------|
| 1,4                                                  | 1(0.3)    | 1(0.3)    | 0       |
| Pathology stage, <i>n</i> (%)                        |           |           |         |
| I                                                    | 112(37.3) | 110(37.7) | 2(25)   |
| II                                                   | 117(39)   | 113(38.7) | 4(50)   |
| IIIA                                                 | 22(7.3)   | 21(7.2)   | 1(12.5) |
| IIIB                                                 | 32(10.7)  | 31(10.6)  | 1(12.5) |
| IIIC                                                 | 7(2.3)    | 7(2.3)    | 0       |
| IVA                                                  | 3(1)      | 3(1)      | 0       |
| IVB                                                  | 7(2.3)    | 7(2.3)    | 0       |
| Treatment before surgery <sup>c</sup> , <i>n</i> (%) |           |           |         |
| 0                                                    | 260(86.7) | 252(86.3) | 0       |
| 1                                                    | 16(5.3)   | 16(5.5)   | 0       |
| 2                                                    | 12(4)     | 12(4.1)   | 0       |
| 3                                                    | 6(2)      | 6(2.1)    | 0       |
| 4                                                    | 2(0.7)    | 2(0.7)    | 0       |
| 5                                                    | 2(0.7)    | 2(0.7)    | 0       |
| 6                                                    | 1(0.3)    | 1(0.3)    | 0       |
| 7                                                    | 1(0.3)    | 1(0.3)    | 0       |
| HDV Genotype                                         |           |           |         |
| HDV-2, <i>n</i>                                      | 1         | 0         | 1       |
| HDV-4, <i>n</i>                                      | 2         | 0         | 2       |
| HDV-2/HDV-4, <i>n</i>                                | 2         | 0         | 2       |
| ND <sup>d</sup> , <i>n</i>                           | 3         | 0         | 3       |

a. HCC type: 1. Solitary; 2. Multiple

b. Vascular invasion: 0. Absent ; 1. capsular vein invasion; 2. portal vein tumor thrombosis (micro); 3. portal vein tumor thrombosis (grossly); 4. portal vein tumor thrombosis (gross and micro)

- c. Treatment before surgery "no"=0 "TAE/TACE"=1 "Surgical"=2 "RFA"=3 "TAE/TACE,RFA"=4 "chemotherapy"=5 "TAE/TACE,RFA,cryotherapy"=6 "TAE/TACE,PEI/Alcohol injection"=7 "missing data"
- d. ND: HDV RNA undetectable

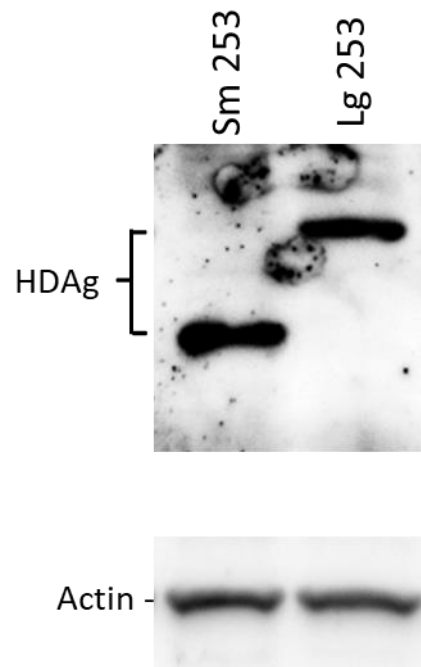

**Figure S1.** Illustration of the efficiencies of HDAg overexpression in Huh7 cells, as determined by analyzing HDAg protein expression via WB. Sm 253 and Lg 253 denote S-HDAg and L-HDAg, respectively, derived from the serum sample of HCC 253.
